# Supplementary material
Source: Springer Nature journal article supplement (https://www.springermedizin.de/resource/supplementary/12963_2010_97_MOESM8_ESM.pdf/9572716)
Supplement: MOESM8 [file 9572716]

| GBD Region                   | 1950 | 1952 | 1954 | 1956 | 1958 | 1960 | 1962 | 1964 | 1966 | 1968 | 1970 | 1972 | 1974 | 1976 | 1978 | 1980 | 1982 | 1984 | 1986 | 1988 | 1990 | 1992 | 1994 | 1996 | 1998 | 2000 | 2002 | 2004 | 2006 |
|------------------------------|------|------|------|------|------|------|------|------|------|------|------|------|------|------|------|------|------|------|------|------|------|------|------|------|------|------|------|------|------|
| Australasia                  | 21   | 20   | 20   | 20   | 20   | 19   | 18   | 18   | 17   | 23   | 23   | 23   | 24   | 24   | 24   | 10   | 9    | 10   | 9    | 9    | 10   | 10   | 10   | 10   | 11   | 11   | 11   | 11   | 12   |
| North America High Income    | 17   | 17   | 16   | 16   | 16   | 16   | 16   | 17   | 17   | 20   | 21   | 21   | 22   | 23   | 24   | 15   | 16   | 17   | 17   | 17   | 15   | 15   | 16   | 16   | 16   | 14   | 15   | 15   | 15   |
| Europe, Western              | 32   | 31   | 31   | 30   | 29   | 28   | 28   | 28   | 27   | 34   | 34   | 34   | 35   | 35   | 35   | 23   | 23   | 22   | 22   | 21   | 21   | 20   | 19   | 19   | 19   | 20   | 20   | 19   | 19   |
| Asia Pacific High Income     | 25   | 25   | 26   | 28   | 26   | 26   | 26   | 25   | 25   | 30   | 30   | 29   | 30   | 31   | 31   | 19   | 20   | 21   | 26   | 27   | 26   | 25   | 22   | 18   | 18   | 18   | 17   | 18   | 19   |
| Europe, Eastern              |      |      |      |      |      |      |      |      |      |      |      |      |      |      |      | 13   | 12   | 16   | 10   | 11   | 15   | 17   | 17   | 16   | 15   | 16   | 16   | 17   | 17   |
| Asia, Central                |      |      |      |      |      |      |      |      |      |      |      |      |      |      |      |      | 13   |      | 12   | 13   | 13   | 14   | 16   | 17   | 18   | 16   | 17   | 17   | 21   |
| Asia, East                   |      |      |      | 17   | 18   | 22   | 26   | 27   | 28   | 29   | 37   | 35   | 35   | 36   | 35   | 19   | 18   | 18   | 18   | 9    | 8    | 8    | 7    | 8    | 8    | 7    | 12   | 18   | 16   |
| Europe, Central              |      |      | 27   | 27   | 26   | 37   | 34   | 33   | 32   | 35   | 41   | 41   | 41   | 40   | 40   | 31   | 32   | 32   | 30   | 30   | 29   | 29   | 27   | 28   | 21   | 22   | 22   | 22   | 23   |
| Latin America, Central       | 39   | 42   | 41   | 33   | 30   | 31   | 31   | 32   | 32   | 42   | 35   | 37   | 38   | 36   | 38   | 30   | 27   | 24   | 24   | 23   | 22   | 21   | 20   | 19   | 18   | 16   | 16   | 16   | 17   |
| Caribbean                    |      | 33   | 26   | 25   | 21   | 31   | 24   | 24   | 37   | 37   | 34   | 35   | 35   | 34   | 33   | 34   | 30   | 29   | 27   | 26   | 27   | 25   | 26   | 26   | 20   | 18   | 17   | 17   | 12   |
| Latin America, Tropical      |      |      |      |      |      |      | 48   |      | 39   | 40   | 39   | 45   | 42   | 41   | 41   | 36   | 36   | 37   | 35   | 34   | 32   | 32   | 32   | 30   | 30   | 28   | 28   | 26   | 23   |
| Latin America, Andean        |      |      |      |      |      |      |      | 34   | 27   | 40   | 37   | 36   | 42   |      | 37   | 30   | 31   | 35   | 48   | 46   | 47   | 45   | 49   | 42   | 42   | 35   | 37   | 34   | 52   |
| Latin America, Southern      |      |      |      | 26   | 24   | 24   | 26   | 24   | 27   | 31   | 33   | 31   | 33   | 35   | 38   | 37   | 37   | 39   | 39   | 39   | 37   | 38   | 37   | 37   | 32   | 32   | 34   | 32   | 32   |
| North Africa/Middle East     |      |      |      | 26   | 26   | 27   | 26   | 29   | 29   |      | 70   | 69   | 71   | 74   | 73   | 65   | 48   | 60   | 26   | 32   | 59   | 59   | 59   | 69   | 63   | 46   | 23   | 45   | 43   |
| Asia, Southeast              | 39   | 41   | 41   | 44   | 54   | 58   | 60   | 45   | 44   | 45   | 47   | 49   | 51   | 47   | 49   | 64   | 67   | 65   | 66   | 66   | 69   | 53   | 49   | 45   | 44   | 54   | 39   | 40   | 55   |
| Sub Saharan Africa, Southern |      |      |      |      |      |      |      |      |      |      |      |      |      |      |      |      |      |      |      |      | 27   |      | 26   | 43   | 38   | 32   | 30   | 28   | 39   |
| Asia South                   |      |      |      |      |      |      |      |      |      |      |      |      |      |      |      |      |      |      |      |      | 31   | 32   | 30   | 31   | 32   | 33   |      |      |      |
| Oceania                      |      |      |      |      |      |      |      |      |      |      |      |      |      |      | 49   | 27   |      |      |      |      |      | 44   | 50   | 51   | 48   | 45   |      |      |      |
| Sub Saharan Africa, West     |      |      |      |      |      |      |      |      |      |      |      |      |      |      |      | 47   |      | 32   |      |      |      |      |      |      |      |      |      |      |      |
| Sub Saharan Africa, Central  |      |      |      |      |      |      |      |      |      |      |      |      |      |      |      |      |      |      |      |      |      |      |      |      |      |      |      |      |      |
| Sub Saharan Africa, East     |      |      |      |      |      |      |      |      |      |      |      |      |      |      |      |      |      |      |      |      |      |      |      |      |      |      |      |      |      |
| Global                       | 24   | 25   | 26   | 26   | 26   | 27   | 27   | 27   | 27   | 32   | 34   | 34   | 36   | 35   | 36   | 25   | 23   | 25   | 23   | 21   | 22   | 23   | 22   | 22   | 21   | 21   | 20   | 22   | 22   |
